# Supplementary material
Source: PubMed Central journal article supplement (PMC2807217)
Supplement: 00501.2009_1.pdf [file 00501.2009_1.pdf]

**A****Expt 1a (n=11)**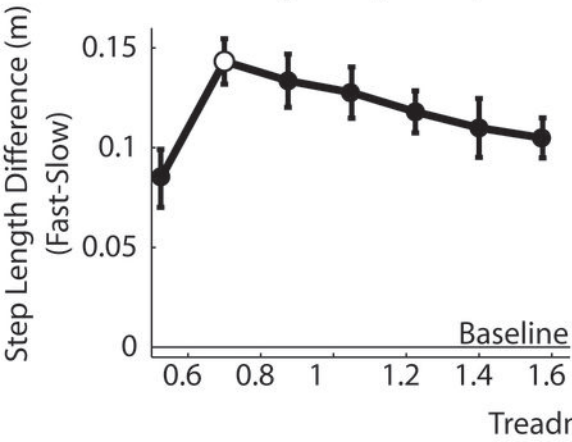**B****Expt 1a (n=20)**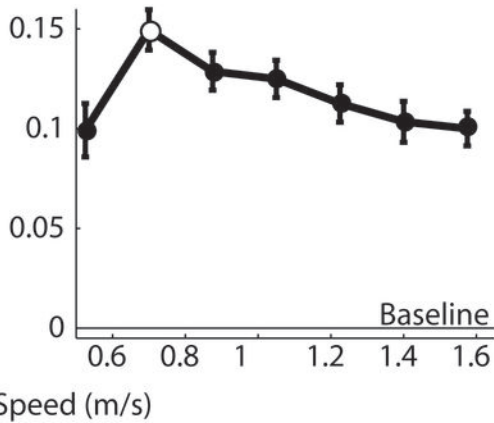

**Supplementary Figure 1:** Comparison of speed generalization functions in experiment 1a with **(A)** and without **(B)** the exclusion of subjects. **(A)** Experiment 1a generalization function, as shown in Figure 3A, with step-length differences averages ( $\pm$  standard error) for 11/20 subjects who showed stable catch trials. The slow belt speed (0.7 m/s) is marked by the open circle. **(B)** Same as (A) except data is averaged across all 20 subjects, regardless of the stability of the catch trials.
